# Supplementary material for: Genome‑wide identifcation and expression analysis of the growth-regulating factors under drought in Brassica juncea
Source: Research Square preprint supplement (doi:10.21203/rs.3.rs-4128359/v1), 2024-06-04
Supplement: Supplementary file 1 [file 0d017550d1607b7d0bf1d367.xlsx]

## Sheet: Sheet1
Table S3. Expression of BjGRF genes under drought stress in the four-leaf stage
Gene	Time	Expression	Error value
BjGRF03	0h	1	0.2297
BjGRF03	3h	17.5632	1.2501
BjGRF03	6h	2.41462	0.3336
BjGRF03	12h	0.46264	0.06178
BjGRF03	24h	5.90112	1.07275
BjGRF09	0h	1	0.37523
BjGRF09	3h	16.9343	0.97162
BjGRF09	6h	2.96923	0.3915
BjGRF09	12h	0.44191	0.07689
BjGRF09	24h	4.28905	1.03697
BjGRF06	0h	1	0.10411
BjGRF06	3h	0.9014	0.13616
BjGRF06	6h	0.66601	0.07597
BjGRF06	12h	0.59102	0.08393
BjGRF06	24h	1.30081	0.1537
BjGRF16	0h	1.00022	0.0294099
BjGRF16	3h	10.0276	1.24054
BjGRF16	6h	2.50171	0.281421
BjGRF16	12h	0.250276	0.0559538
BjGRF16	24h	3.3656	0.983053
BjGRF23	0h	1.0015	0.0666115
BjGRF23	3h	0.930117	0.0955656
BjGRF23	6h	0.4089	0.167427
BjGRF23	12h	0.751452	0.0963309
BjGRF23	24h	1.72961	0.226219
BjGRF29	0h	1.00868	0.093394
BjGRF29	3h	3.4678	0.307473
BjGRF29	6h	0.635062	0.151067
BjGRF29	12h	0.620101	0.315886
BjGRF29	24h	3.99733	0.475444
BjGRF26	0h	1	0.13438
BjGRF26	3h	1.52494	0.1297
BjGRF26	6h	1.2979	0.1778
BjGRF26	12h	1.01217	0.09012
BjGRF26	24h	3.7776	0.39489
BjGRF32	0h	1	0.44171
BjGRF32	3h	15.3268	0.82568
BjGRF32	6h	1.2875	0.13583
BjGRF32	12h	0.70428	0.03708
BjGRF32	24h	5.42293	0.21056
BjGRF33	0h	1	0.11262
BjGRF33	3h	3.15001	0.3119
BjGRF33	6h	1.65326	0.14481
BjGRF33	12h	0.32362	0.012
BjGRF33	24h	1.24417	0.19985
BjGRF34	0h	1.00052	0.0397378
BjGRF34	3h	1.37292	0.0475745
BjGRF34	6h	1.2326	0.0730126
BjGRF34	12h	0.552293	0.0463296
BjGRF34	24h	5.02039	0.243519
