# Supplementary material for: Genome‑wide identifcation and expression analysis of the growth-regulating factors under drought in Brassica juncea
Source: Research Square preprint supplement (doi:10.21203/rs.3.rs-4128359/v1), 2024-06-04
Supplement: Supplementary file 2 [file 0f04a7bea67eec578e188796.xlsx]

## Sheet: Sheet
Table S1. The BjGRF gene contained cis-acting elements
Light responsive elements	291
Hormone responsive elements	192
Stress related elements	144
Plant growth related elements	36

## Sheet: Sheet2
Table S1. Elements related to hormone response contained in the BjGRF gene
MeJA responsive elements	74
Gibberellin responsive elements	31
Abscisic acid responsive elements	41
Auxin responsive elements	16
Salicylic acid responsive elements	30

## Sheet: Sheet3
Table S1. Elements related to stress response contained in the BjGRF gene
Anoxic responsive elements	64
Drought responsive elements	24
Defense and stress responsive elements	22
Wound responsive elements	10
low temperature responsive elements	24

## Sheet: Sheet4
Table S1. Elements related to plant growth contained in the BjGRF gene
Meristem related elements	11
Circadian related elements	12
Endosperm expression elements	3
Zein related element	9
Cell cycle regulation elements	1
