# Supplementary material for: Genome‑wide identifcation and expression analysis of the growth-regulating factors under drought in Brassica juncea
Source: Research Square preprint supplement (doi:10.21203/rs.3.rs-4128359/v1), 2024-06-04
Supplement: Supplementary file 3 [file 4600ef97c9e7b624fbb9b982.xlsx]

## Sheet: Sheet1
Table S4. The qRT-PCR Primers
Name	Sequence (5'-3')
BjGRF01-F	CACATGCACAGAGGAAGAAACC
BjGRF01-R	TTGGGATGTTGTTGGGGAAAGA
BjGRF02-F	CTTCGGGGGAGATGGGAAGA
BjGRF02-R	AAGTGTGGGAAGGGTGCTTG
BjGRF03-F	AGACACATCAACAGAGGCCG
BjGRF03-R	TGTTCCTTGGGTGGCAAGTT
BjGRF04-F	TCTCGCCCTATCAACATCGG
BjGRF04-R	TTTCTTGCTCGTTTGACGCC
BjGRF05-F	ATGATGAGCATGCAGGGGAA
BjGRF05-R	ACAGCATCTCTTGAGCACCT
BjGRF06-F	AGGTGCAAGAGAACAGACGG
BjGRF06-R	TTCTTGAACGAGGACGGCTC
BjGRF07-F	GAGGAAGAAACCGTGCCAAGA
BjGRF07-R	GTGGGGCTTATTGGGTTGTCT
BjGRF08-F	GCTTGTTGACAGGAGCTAAAGG
BjGRF08-R	GCACCGCCATTTCTTTCCAT
BjGRF09-F	CTCCTTTGCTTTTGGCGGTG
BjGRF09-R	TTGTCGGCTTCAGAACGAGG
BjGRF10-F	GCAACATAACTTCCCCCATCAC
BjGRF10-R	GGCTACAACATCCCTCGAACA
BjGRF11-F	CACCACCACTACCATGGCTT
BjGRF11-R	CTCGTACGGCCTCTTGTTGT
BjGRF12-F	GATCCTGAACCCACAAGGTG
BjGRF12-R	AACTGACATTGCCCCATGAGA
BjGRF13-F	ACCACCCTCTTCAACACCTC
BjGRF13-R	CCACCGCCAAAAGCAAACAA
BjGRF14-F	GCTCAAGAGAAGCATACCCAGA
BjGRF14-R	GAGGAAGAAGACAAGGTAGGGC
BjGRF15-F	CAATCCAGTCCGGTTCTGCT
BjGRF15-R	GAACTGGAATGTTTGCCGCT
BjGRF16-F	AGGTGCAAGAGAACAGACGG
BjGRF16-R	ATGTGGCGGTCGCAATACTT
BjGRF17-F	CTAGCTGGTGCTTCTGTTCCT
BjGRF17-R	TCTCCATTTCTTCCCGTCCG
BjGRF18-F	GCTCAAGAGAAGCATACCCAGA
BjGRF18-R	GTTGTTGTTGCTGGGGAAAGA
BjGRF19-F	TGCTCTAAGGACGCTTCTCC
BjGRF19-R	ATTGATTGACCCGGAAGGCT
BjGRF20-F	TCGCCAATACCACCACAACT
BjGRF20-R	GAGACTCGTACGGCCTCTTG
BjGRF21-F	AGAACACTGGGACAATGCCT
BjGRF21-R	ACGTAGTCGCACCTCTTTGT
BjGRF22-F	TACAAACGCGCAACTCAAGG
BjGRF22-R	CGTCTGTTCTCCGGCATCTT
BjGRF23-F	CTGGGGATTGCTTCAAACGC
BjGRF23-R	TTCTTGAACGAGGACGGCTC
BjGRF24-F	TCTCTCACCGTTTCTCCACC
BjGRF24-R	CCATGTTACCCCCTCCGAAA
BjGRF25-F	CTGGAAGATGCCGGAGAACA
BjGRF25-R	GCTTTCTTGAACGAGGACGG
BjGRF26-F	TCAATGGCAGGAGCTTGAGAG
BjGRF26-R	CATATCAGCCGCGTTGTTGC
BjGRF27-F	ACAACAAGAACTCTCTCCCCC
BjGRF27-R	AAGGAACAGGGACATTGGCT
BjGRF28-F	AGAGTAGTGATGGCTCGCTG
BjGRF28-R	CGCCTTCCTCAACAAACCGA
BjGRF29-F	GAGATGTGGTAGGCGGTCAC
BjGRF29-R	GGAAGATTTGGCGGTTGTGG
BjGRF30-F	AGCCCACTTGGTATATGGGGA
BjGRF30-R	AGAGGTAGTGGCATTGACGG
BjGRF31-F	CAAGAGAGGCACACCCAGATT
BjGRF31-R	GAAGAAGACAAGGTGGGGCTT
BjGRF32-F	TACATGTTGGCTGGTGCTTCT
BjGRF32-R	GACCGCCTACAACATCCCTC
BjGRF33-F	TCTCCCCTGCTTCCGACAAA
BjGRF33-R	AGGGACATTGGCTGTGATGT
BjGRF34-F	TCTTCACCACCCTCTTCAACAC
BjGRF34-R	GTTGTGGTAGCATTGACGGTG
BjUBQ9-F	GAAGACATGTTCCATTGGCA
BjUBQ9-R	ACACCTTAGTCCTAAAAGCCA
