# Supplementary material for: Genome‑wide identifcation and expression analysis of the growth-regulating factors under drought in Brassica juncea
Source: Research Square preprint supplement (doi:10.21203/rs.3.rs-4128359/v1), 2024-06-04
Supplement: Supplementary file 4 [file 6b9b0498b24f9db391a49ed9.xlsx]

## Sheet: Sheet1
Table S5. Location of qRT PCR primers on gene sequences
Gene ID	mRNA		CDS (Exon)
BjuA01g06510S	4471490	4473568	4471980	4472535
			4472661	4473100
			4473172	4473179
BjuA01g31170S	26356712	26358389	26356908	26357340
			26357417	26357717
			26357825	26358007
			26358098	26358389
BjuA01g42700S	34144605	34146406	34144605	34145130
			34145215	34145464
			34145691	34145882
			34146019	34146406
BjuA02g29680S	26463307	26464531	26463307	26463355
			26463442	26464358
BjuA03g03410S	5608415	5610557	5608415	5608760
			5608856	5609047
			5609497	5609803
			5609875	5610361
BjuA03g11330S	12355158	12357087	12355158	12355614
			12355683	12356037
			12356117	12356284
			12356372	12356651
BjuA03g25350S	21205697	21207457	21206114	21206543
			21206634	21207114
			21207259	21207457
BjuA03g34750S	26354419	26357123	26354527	26354857
			26355137	26355349
			26355564	26355900
			26356169	26356844
BjuA03g41020S	29982618	29985087	29982882	29983086
			29983183	29983362
			29983671	29983971
			29984640	29985060
BjuA04g05650S	4536949	4541587	4536949	4537159
			4537268	4537459
			4537710	4538004
			4538736	4539086
			4539243	4539285
			4540501	4540652
			4540743	4540800
			4541014	4541082
			4541174	4541269
			4541361	4541450
			4541537	4541587
BjuA04g23150S	18787897	18790099	18787897	18788326
			18789030	18789375
			18789602	18789784
			18789886	18790099
BjuA04g28180S	21729972	21731814	21729972	21730236
			21730508	21730969
			21731051	21731239
			21731303	21731700
BjuA05g07930S	4837070	4839815	4837259	4837466
			4837559	4837750
			4838125	4838464
			4839325	4839751
BjuA05g30670S	27272353	27273965	27272449	27272891
			27272973	27273486
			27273767	27273965
BjuA07g05380S	7643514	7646415	7643514	7643847
			7643934	7644177
			7644285	7644498
			7646005	7646415
BjuA07g18060S	18040155	18045656	18040243	18040293
			18040386	18040475
			18040577	18040672
			18040764	18040832
			18041085	18041142
			18041222	18041388
			18042297	18042651
			18044665	18044959
			18045147	18045335
			18045443	18045656
BjuA09g20250S	11435497	11437925	11435497	11435713
			11435807	11436001
			11436289	11436598
			11437229	11437655
BjuB01g08310S	4488330	4490421	4488800	4489319
			4489415	4489866
			4490321	4490421
BjuB01g22600S	22978664	22979740	22978734	22978923
			22979034	22979292
			22979404	22979740
BjuB01g43920S	52977036	52979389	52977134	52977554
			52978314	52978644
			52978902	52979084
			52979182	52979389
BjuB01g49280S	56748456	56750613	56748733	56748964
			56749292	56749747
			56749839	56750024
			56750094	56750503
BjuB02g26640S	45710055	45714031	45710321	45710420
			45711321	45711504
			45712184	45712649
			45712773	45712854
			45713267	45713536
			45714026	45714031
			71928123	71928420
BjuB02g69190S	71928123	71929707	71928503	71928676
			71928825	71929182
			71929254	71929707
			75493319	75493892
BjuB02g75260S	75493319	75495057	75493319	75493892
			75493972	75494287
			75494444	75494635
			75494715	75495057
BjuB05g34880S	48336844	48338175	48336844	48337826
			48337914	48338028
BjuB05g51630S	59247176	59249127	59247555	59247858
			59247937	59248113
			59248275	59248620
			59248698	59249127
BjuB05g61460S	65664519	65666627	65664668	65665229
			65665301	65665574
			65665776	65665964
			65666106	65666511
BjuB06g00370S	423617	436870	423617	423667
			423757	423846
			423933	424175
			424417	424474
			424569	424736
			425581	425937
			426667	426958
			427131	427322
			427435	427734
			429749	429809
			433442	433854
			436378	436870
BjuB06g09050S	6401075	6406539	6401075	6401125
			6401236	6401325
			6401427	6401522
			6401613	6401681
			6401953	6402010
			6402087	6402238
			6404375	6404774
			6405475	6405769
			6406055	6406240
			6406338	6406539
BjuB06g50190S	66067076	66070336	66067512	66067932
			66068773	66069109
			66069479	66069658
			66069743	66069947
BjuB07g45940S	55668805	55670849	55669181	55669188
			55669294	55669718
			55669840	55670347
			55670651	55670849
BjuB08g07310S	5254304	5257131	5254704	5254920
			5255023	5255217
			5255448	5255757
			5256443	5256863
BjuB08g35300S	52403475	52406147	52403585	52403915
			52404187	52404399
			52404661	52404997
			52405254	52405926
BjuB08g43680S	60234917	60237203	60234917	60235121
			60235222	60235413
			60235756	60236059
			60236780	60237203
