# Supplementary material for: Genome‑wide identifcation and expression analysis of the growth-regulating factors under drought in Brassica juncea
Source: Research Square preprint supplement (doi:10.21203/rs.3.rs-4128359/v1), 2024-06-04
Supplement: Supplementary file 5 [file 8db27a9b39c83a8eb4822d59.xlsx]

## Sheet: Sheet1
Table S2. Expression of BjGRF genes in different tissue parts of Brassica juncea seedling stage
Gene	Tissue	Expression	Error value
	leaf	0.14144	0.01155
BjGRF01	root	1	0.05578
	stem	0.11112	0.01076
	leaf	1.72209	0.02218
BjGRF02	root	0.69211	0.12862
	stem	0.25488	0.11954
	leaf	0.74599	0.07036
BjGRF03	root	1	0.10655
	stem	0.064	0.00736
	leaf	2.19932	0.32253
BjGRF04	root	0.6133	0.24003
	stem	1.30891	0.42158
	leaf	0.1681	0.00894
BjGRF05	root	1	0.02288
	stem	0.01407	0.0023
	leaf	2.63946	0.3243
BjGRF06	root	1	0.10854
	stem	0.38701	0.05597
	leaf	2.26364	0.13992
BjGRF07	root	0.91648	0.0711
	stem	0.82613	0.1398
	leaf	0.13565	0.00178
BjGRF08	root	1	0.11162
	stem	0.01669	0.00215
	leaf	0.10189	0.01035
BjGRF09	root	1	0.16726
	stem	0.01825	0.00136
	leaf	0.67251	0.15411
BjGRF10	root	0.3556	0.027
	stem	1.44019	0.05619
	leaf	0.08704	0.00557
BjGRF11	root	1	0.16512
	stem	0.0117	0.00385
	leaf	0.29854	0.01459
BjGRF12	root	1	0.07473
	stem	1.44019	0.05619
	leaf	0.03632	0.00899
BjGRF13	root	1	0.05999
	stem	0.02294	0.00334
	leaf	0.06838	0.00985
BjGRF14	root	1	0.11263
	stem	0.08955	0.01076
	leaf	0.1984	0.16058
BjGRF15	root	0.23572	0.00841
	stem	2.46467	0.19291
	leaf	3.06527	0.17092
BjGRF16	root	0.27605	0.03074
	stem	0.43298	0.03643
	leaf	1.69722	0.08946
BjGRF17	root	0.99378	0.05603
	stem	0.08683	0.0221
	leaf	0.10239	0.01337
BjGRF18	root	1	0.1168
	stem	0.06686	0.02203
	leaf	0.56838	0.00394
BjGRF19	root	1	0.03438
	stem	0.89727	0.07092
	leaf	0.018	0.00115
BjGRF20	root	1	0.15638
	stem	0.01399	0.00161
	leaf	0.13213	0.06405
BjGRF21	root	1	0.19577
	stem	0.7615	0.07022
	leaf	1.30292	0.37019
BjGRF22	root	1	0.122
	stem	2.11384	0.26254
	leaf	3.06527	0.19774
BjGRF23	root	0.5276	0.09059
	stem	0.13419	0.00865
	leaf	0.12142	0.01193
BjGRF24	root	1	0.07215
	stem	0.02279	0.00185
	leaf	0.5071	0.04504
BjGRF25	root	1	0.06338
	stem	0.03923	0.00368
	leaf	2.20233	0.28344
BjGRF26	root	1	0.14148
	stem	0.18081	0.01236
	leaf	0.44749	0.03019
BjGRF27	root	1	0.24138
	stem	0.07923	0.00829
	leaf	0.07298	0.00046
BjGRF28	root	1	0.04429
	stem	0.09693	0.00648
	leaf	0.91021	0.11377
BjGRF29	root	1	0.13242
	stem	0.47211	0.03126
	leaf	0.51865	0.04877
BjGRF30	root	1	0.10123
	stem	0.05304	0.02055
	leaf	1.61977	0.29318
BjGRF31	root	0.683	0.01125
	stem	0.1917	0.25616
	leaf	2.09944	0.07694
BjGRF32	root	1	0.10816
	stem	0.14073	0.01952
	leaf	0.06963	0.00262
BjGRF33	root	1	0.12892
	stem	0.01684	0.00129
	leaf	2.27781	0.15821
BjGRF34	root	1	0.08374
	stem	1.21881	0.28137
